# Supplementary material for: Novel Grafted Hydrogel for Iron and Ammonia Removal from Ground Water, Synthesis and Computational Chemistry Study
Source: Preprints.org preprint supplement (doi:10.20944/preprints202308.0395.v1), 2023-08-04
Supplement: Supplementary file 2 [file supplementary]

**Supplementary Material**

**Novel grafted hydrogel for Iron and ammonia removal from ground water, synthesis and computational chemistry study**

**H. M. Abd El-Salam 1, Ali M El Shafey 1, and Mahmoud K. Abdel-Latif 2,3 ***

1 Department of Chemistry, Faculty of Science, Polymer Research Laboratory, Beni-Suef University, 62514 Beni-Suef City, Egypt,

2 Chemistry Department, Collage of Science, United Arab Emirates University, Al-Ain, UAE

3 Chemistry Department, Faculty of Science, Beni-Suef University, Beni-Suef City, Egypt

* Corresponding author. E-mail address: [mahmoudkorani@uaeu.ac.ae,](mailto:mahmoud.abdellatif@science.bsu.edu.eg) m_kkhedr@yahoo.com


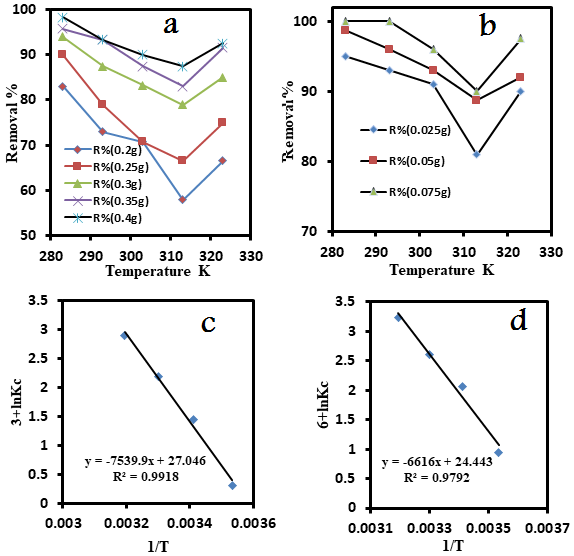


**Figure S1: Effect Temperature on the removal iron(A) and ammonia(b) efficiency at different dose of grafted hydrogel. Van’t Hoff plot for the adsorption of iron (c) and ammonia (d) on grafted hydrogel**


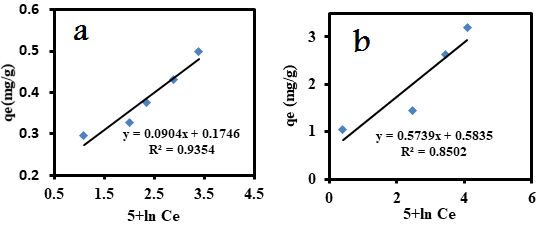


**Figure S2: Temkin isotherm for iron (a) and ammonia (b) removal by grafted hydrogel**


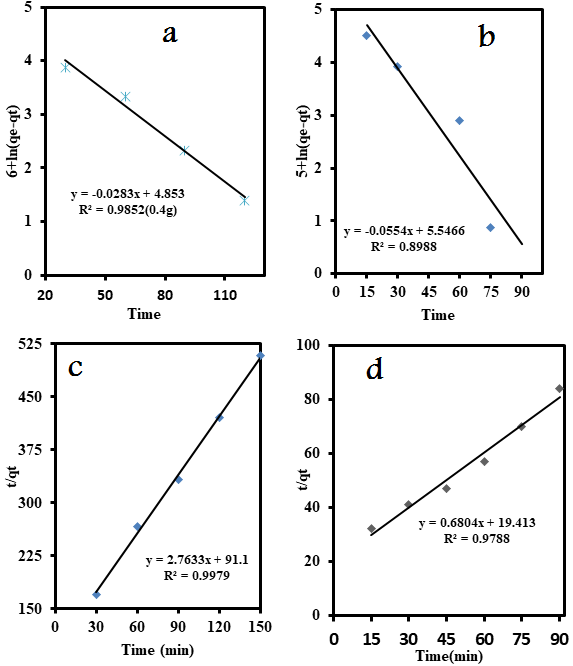


**Figure S3: Pseudo‑first‑order kinetic model of iron (a) and ammonia (b) removal. Pseudo‑second‑order kinetic model of iron (c) and ammonia (d) removal.**

**
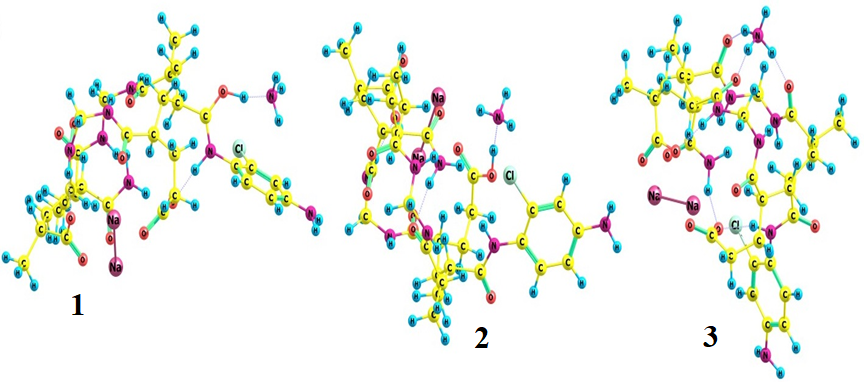
**

**Figure S4: The optimized structure of complexed grafted hydrogel different positions with NH4+ ion at B3LYP/6-311G(d,p) level of theory**

**Table S1: IR bands and their assignments for hydrogel and grafted hydrogel.**

| **Wave number cm-1** | **Wave number cm-1** | **Assignments** | **Ref.** |
| --- | --- | --- | --- |
| **Hydrogel** | **Grafted hydrogel** |
| 612**vw** | 608**m** | Stretching vibration of substituted benzene ring | a* |
| 777**vw** | 783**s** |
| 1115w | 1110w | C-O and C-N stretching | b* |
| 1176w | 1180w | c* |
| 1334w | 1330w | CH2 bending | d* |
| 1449m | 1447m |
| - | 1590w | C=O, C=C and/or adsorbed H2O molecules and –COONa | e* |
| 1656s | 1657s |
| - | 2069m | Overtone and combination bands |
| 2376w | 2382w |
| 2516w | - | Aliphatic CH | f* |
| 2859w | - |
| 2926m | 2931s |
| 3422b | 3410b | Stretching vibration of OH and/or NH2 free or bonded | g* |
| w=weak, b=broad, s=strong, m=medium | | | |

a*: (Abd El-Mageed, Abd El-Salam, Abdel- Latif, & Mustafa, 2018)

b*: (Monteiro & Neves, 2014)

c*: (Paiva, 2007)

d*: (Silverstein, Bassler, & Morill, 1974)

e*: (Reddy & Lee, 2007)

f*: (Asabe & Bashar, 2016)

g*: (Rojas & Carlos 2019)

**Table S2: TGA data of the fabricated samples (hydrogel and grafted hydrogel).**

| **TGA parameters for polymeric samples** | | | | **Comments** |
| --- | --- | --- | --- | --- |
| **Hydrogel** | | **grafted hydrogel** | |
| Midpiont 0C | Approx. Wt. loss % | Midpiont 0C | Approx. Wt. loss % |
| 73 | 4 | 95 | 2 | Moisture losing |
| 140 | 12 | 116 | 8 | Bonded water loss |
| 233 | 21 | 220 | 13 |
| 335 | 38 | 367 | 17 | Series of fragmentation of the polymer backbone depend on the bond strength between atoms |
| 371 | 50 | - | - |
| 403 | 52 | - | - |
| 422 | 63 | 441 | 55 |
| 466 | 72 | 460 | 60 |
| 703 | 90 | 725 | 60 | Complete degradation with carbonic residue is about 10% for hydrogel but for graft the residue is about 40%. |
| - |  | 821 | 60 |
| - |  | 918 | 60 |
| - |  | 952 | 60 |

**Table S3: Thermodynamic parameters**

| G (kJ mol-1)∆ | | Thermodynamic parameters | |
| --- | --- | --- | --- |
| Removal of iron | Removal of ammonia |
| -6332.12 | -1076.26 | 283 | Temperature K |
| -3795.64 | -1051.82 | 293 |
| -2042.85 | -1021.42 | 303 |
| -280.085 | -912.508 | 313 |
| -62.687 | -55.005 | ∆H (kJ mol-1) | |
| -244.9 | -203.219 | S (J mol-1 K -1)∆ | |

**Table S4: Kinetic models parameters data.**

| **Parameter value** | | | **Parameter** | **Model** |
| --- | --- | --- | --- | --- |
| **Iron removal** | **Ammonia removal** | |
| 0.0283 | | 0.0554 | k1(min-1) | **Pseudo-first order** |
| 128 | | 254.6 | qe (mg g-1) |
| 0.98 | | 0.8988 | R2 |
| 7.71 | | 0.023 | k2(min-1) | **Pseudo-second order** |
| 0.295 | | 1.06 | qe(exp) (mg g-1) |
| 0.36 | | 1.469 | qe(cal) (mg/g) |
| 0.9979 | | 0.9788 | R2 |
